# Supplementary material for: Small tandem DNA duplications result from CST-guided Pol α-primase action at DNA break termini
Source: PubMed Central journal article supplement (PMC8355091; doi:10.1038/s41467-021-25154-w), 2021-08-10
Supplement: 41467_2021_25154_MOESM3_ESM.pdf [file 41467_2021_25154_MOESM3_ESM.pdf]

## **Description of Additional Supplementary Files**

File Name: Supplementary Data 1

Description: overview of used mES cell-lines

File Name: Supplementary Data 2

Description: overview of Cas9-nickase target-sites

File Name: Supplementary Data 3

Description: Statistical analysis targeted sequencing

File Name: Supplementary Data 4

Description: Description raw targeted sequences-files
